# Supplementary material
Source: PubMed Central journal article supplement (PMC11645227)
Supplement: NIHMS2018712-supplement-Supp1.pdf [file NIHMS2018712-supplement-Supp1.pdf]

# Time 1: Demographics

Record ID

---

## COMPLETE THE SECTION BELOW FROM THE PATIENT'S MEDICAL CHART

Study ID Assigned by Medication Safety Research Team

---

Medical Record Number (MRN)

---

(Type medical record number from the EHR)

Patient's Sex

Female  Male

Date of Birth

---

(Type year of birth here (mm/dd/yyyy))

Is the patient of HISPANIC, Latino, or Spanish origin? [ENTER FROM MEDICAL CHART]

Yes  No

Enter patient's race from medical chart [CHECK ONE OR MORE BOXES THAT APPLY]

- White  
 Black/African American  
 American Indian/Alaskan Native  
 Asian  
 Native Hawaiian/Other Pacific Islander  
 More than one race  
 Unknown or unreported  
 Other

## PLEASE COMPLETE THE SECTION BELOW BY ASKING THE PATIENT

What transportation do you use OR is available for you to use?  
 IF A CAREGIVER IS ANSWERING, ASK: What transportation does [PATIENT'S NAME] use?

- Your own car  
 Public transit  
 Walk  
 Family/Friend  
 Taxi/Uber/Lyft  
 Other

If using other types of transportation modes, type responses below:

---

What is your education level?

- Below high school  
 Completed some high school  
 High school graduate  
 Completed some college  
 Associates degree  
 Bachelor's degree  
 Master's or above

Presently, how many people live in your house, including you?

---

What is your approximate yearly household income?

- Under \$10,000  
 \$10,000 - \$14,999  
 \$15,000 - \$24,999  
 \$25,000 - \$34,999  
 \$35,000 - \$49,999  
 \$50,000 - \$74,999  
 \$75,000 and above

Do you have a primary care provider?

- Yes  No

If No, who do you see for majority of your healthcare?

\_\_\_\_\_

In the past ONE year, how many doctors wrote you prescriptions?

\_\_\_\_\_

Do you have insurance, including Medicare and Medicaid?

- Yes  No

If Yes, can you tell me which types of insurance you have?

- Medicare  
 Medicaid  
 Commercial/Private Insurance  
 Other

Who do you live with?

\_\_\_\_\_

**COMPLETE THE SECTION BELOW ONLY IF A CAREGIVER IS AVAILABLE AND CONSENTED TO BE INTERVIEWED**

IS CAREGIVER PRESENT AND CONSENTED TO BE INTERVIEWED?  Yes  No

What is the caregiver's sex?

- Female  Male

What is the caregiver's age?

\_\_\_\_\_

Are you of HISPANIC, Latino, or Spanish origin?

- Yes  No

What is your race? [CHECK ONE OR MORE BOXES THAT APPLY]

- White  
 Black/African American  
 American Indian/Alaskan Native  
 Asian  
 Native Hawaiian/Other Pacific Islander  
 More than one race  
 Unknown or unreported  
 Other

What is your relationship to [NAME OF PATIENT]?

- Spouse  
 Partner  
 Daughter/Son/Grandchild  
 Neighbor  
 Friend  
 Hired for a cost  
 Other

---

How long have you been taking care of [NAME OF PATIENT]?

\_\_\_\_\_ (Type number of years, months, or days)

---

In the past three months, on average how many hours per week did you spend on care-giving for [NAME OF PATIENT]?

\_\_\_\_\_

---

**COMPLETE THE NEXT SECTION FROM A CHART REVIEW**

Type All Admission Diagnoses

\_\_\_\_\_

---

Type All Discharge Diagnoses

\_\_\_\_\_

---

Does the patient have a document allergy information in the medical record?

Yes  No

---

If Yes, please type allergy information

\_\_\_\_\_

---

Date of Admission

\_\_\_\_\_

---

Date of Discharge

\_\_\_\_\_

---

Length of hospital stay during current admission [IN DAYS]

\_\_\_\_\_ (Type number of days )

---

Number of hospital admission(s) in the last 12 months, including the current admission.

\_\_\_\_\_

# Time 1: Interview with Patients and Caregivers in Hospital Room

Record ID \_\_\_\_\_

Date of Interview (Time 1)

\_\_\_\_\_  
(mm/dd/yyyy)

Do you have a caregiver at home to help you manage your medications?

Yes  No

If Yes, who is this person?

- Spouse
- Partner
- Daughter/Son/Grandchild
- Neighbor
- Friend
- Someone hired for a fee
- Daughter-in-law/Son-in-law/Other Relative
- Other

If Other is selected, please enter the home caregiver who helps manage patient's medications at home

\_\_\_\_\_

In the past, has your caregiver helped you with any of the following things? [READ OPTIONS OUT LOUD]

- Read discharge instructions
- Explain to you how to take your medications
- Create a medication schedule for when to take what medications
- Fill pillboxes
- Make changes to medications as a result of hospitalization
- Remind you to take your medications
- Update your list of medications
- Help you with medical appointments and other needed tasks

Did you or your caregiver bring a list of your medications OR medication bottles to the hospital when you were admitted?

Yes  No

IS CAREGIVER PRESENT AND CONSENTED TO BE INTERVIEWED?  Yes  No

## THE FOLLOWING QUESTIONS ONLY ASKED TO A CAREGIVER, IF AVAILABLE [GIVE CAREGIVER SHOW CARD FOR REFERENCE]

**On a scale of 1 to 5, 1=Strongly Disagree, 2=Disagree, 3=Neither Agree nor Disagree, 4=Agree, 5=Strongly Agree, what is your level of agreement with the following statements?**

Strongly Disagree      Disagree      Neither Agree Nor Disagree      Agree      Strongly Agree

|                                                                                                                   |                       |                       |                       |                       |                       |
|-------------------------------------------------------------------------------------------------------------------|-----------------------|-----------------------|-----------------------|-----------------------|-----------------------|
| I maintain an updated list of [PATIENT'S NAME]'s medications                                                      | <input type="radio"/> |
| For every medication [PATIENT'S NAME] takes, I know when, how much, and how it is to be taken                     | <input type="radio"/> |
| I have a trusted pharmacist or pharmacy in my community that I can contact if I have medication-related questions | <input type="radio"/> |
| I have or will check with [PATIENT'S NAME] doctor to make sure what medication [HE/SHE] should be taking          | <input type="radio"/> |
| I know what things to watch for that would mean [PATIENT'S NAME]'s condition is getting worse and how to respond  | <input type="radio"/> |

**COMPLETE THE NEXT SECTION BY ASKING THE PATIENT**

In the past, have you always been able to pick up new medications prescribed at discharge?  Yes  No  Not Applicable

If not applicable, choose that applies:  Discharge medications received at hospital  Mail order for new discharge medications

Have you skipped filling your prescriptions due to problems with insurance or paying for medications [such as high co-pays, gaps in coverage, insurance not covering brand name medications]?  Yes  No

**On a scale of 1 to 5, 1=Strongly Disagree, 2=Disagree, 3=Neither Agree nor Disagree, 4=Agree, 5=Strongly Agree, what is your level of agreement with the following statements? [GIVE PATIENT SHOW CARD FOR REFERENCE]**

|                                                               | Strongly Disagree     | Disagree              | Neither Agree Nor Disagree | Agree                 | Strongly Agree        |
|---------------------------------------------------------------|-----------------------|-----------------------|----------------------------|-----------------------|-----------------------|
| I can follow directions when my doctor changes my medications | <input type="radio"/> | <input type="radio"/> | <input type="radio"/>      | <input type="radio"/> | <input type="radio"/> |
| I can manage my medications without help                      | <input type="radio"/> | <input type="radio"/> | <input type="radio"/>      | <input type="radio"/> | <input type="radio"/> |
| I can list my medications, including the doses and schedule   | <input type="radio"/> | <input type="radio"/> | <input type="radio"/>      | <input type="radio"/> | <input type="radio"/> |

I can take my medications when there is a change in my usual day

FOR INFORMATION ONLY:

THE BELOW PRESCRIPTION LABEL APPEARS ON BOTTLE GIVEN TO PATIENTS

|                                                                                                                                                                                                                                                                                                                                                                                                                                                                                                                              |                                                                                                                                                                                                                                                                                                                                                                                                            |
|------------------------------------------------------------------------------------------------------------------------------------------------------------------------------------------------------------------------------------------------------------------------------------------------------------------------------------------------------------------------------------------------------------------------------------------------------------------------------------------------------------------------------|------------------------------------------------------------------------------------------------------------------------------------------------------------------------------------------------------------------------------------------------------------------------------------------------------------------------------------------------------------------------------------------------------------|
|  <p><b>Apollo Pharmacy</b><br/>1024 N Wolfe Street<br/>Baltimore, MD, 21233</p> <p><b>SMITH, JANE/JOHN</b><br/>123 Main Street, BALTIMORE, MD, 12345</p> <p><b>BALTIMPRIL ER 20 MG TABLET</b><br/>Common brand(s): Lowpress</p> <p><b>TAKE ONE TABLET BY MOUTH TWO TIMES DAILY FOR 30 DAYS</b></p> <p>Qty: 60      Refills require authorization</p> <p><b>Phone: 433-888-999</b><br/><b>Rx#: 203129</b></p> <p>Prescriber: April D. May</p> | <p>May cause drowsiness. Use care when operating a vehicle, vessel, or machine</p> <p>RPH: Rhonda    Tech: Richards<br/>Orig: 8/8/2018<br/>Date filled: 8/8/2018<br/>Discard after: 8/8/2019</p> <p>This is a white oval shaped tablet</p> <p>Mfr: Matrix Pharmaceuticals<br/>Caution: Federal law prohibits the transfer of this drug to any person other than the patient for whom it is prescribed.</p> |
|------------------------------------------------------------------------------------------------------------------------------------------------------------------------------------------------------------------------------------------------------------------------------------------------------------------------------------------------------------------------------------------------------------------------------------------------------------------------------------------------------------------------------|------------------------------------------------------------------------------------------------------------------------------------------------------------------------------------------------------------------------------------------------------------------------------------------------------------------------------------------------------------------------------------------------------------|

**Assume that you have been prescribed this medication by your doctor and you just filled the prescription at your local pharmacy. [HAND OVER THE PRESCRIPTION BOTTLE TO PATIENT]. Next, I will ask you some questions based on the prescription bottle in your hand. Now take a moment to examine the bottle before I begin my questions. [PAUSE AND GIVE PATIENT ABOUT A MINUTE OR TWO].**

|                                                                                                                   | Complete              | Incomplete            |
|-------------------------------------------------------------------------------------------------------------------|-----------------------|-----------------------|
| Can you please read the drug name on the medication bottle?                                                       | <input type="radio"/> | <input type="radio"/> |
| Based on your understanding of the label on the bottle, can you please tell me how you will take this medication? | <input type="radio"/> | <input type="radio"/> |
| Can you please open the bottle?                                                                                   | <input type="radio"/> | <input type="radio"/> |

Did patient complete all tasks above?

- All tasks completed  
 Tasks partially completed  
 No task completed

If no task completed or only partially completed, please describe?

---

**INTERVIEWER NOTES**

Please type additional things mentioned by patient or caregiver

---
