# Supplementary material
Source: PubMed Central journal article supplement (PMC11645227)
Supplement: NIHMS2018712-supplement-Supp2.pdf [file NIHMS2018712-supplement-Supp2.pdf]

# Time 3: Home Visit Interview, Medication Review and Structured Observation

---

Record ID

---

---

Date of Interview (Time 3)

---

(mm/dd/yyyy)

---

WHO IS THE RESPONDENT?

Patient  Primary Caregiver

---

Since you came home after your recent hospital discharge, did you go to the emergency department or hospital?

Yes  No

---

If Yes, was it for the same problem for which you were previously hospitalized?

Yes  No

---

Since you came home after your recent hospital discharge, were your medications changed by a doctor or a pharmacist?

Yes  No

---

Since you came home after your recent hospital discharge, has anyone from the hospital or home care agency helped you?

Yes  No

---

If Yes, can you tell me who helped you and what type of help you received?

---

---

When being discharged from the hospital, did you receive an electronic or printed discharge instruction material?

Yes  No

---

Since you came home after your recent hospital discharge, did you or someone else at home review the written discharge instruction materials?

Yes  No

---

If Yes, can you tell me who reviewed the discharge instruction material?

---

---

Since you came home after your recent hospital discharge, did you or someone else at home review the discharge medication list?

Yes  No

---

If Yes, can you tell me who reviewed the discharge medication list?

---

---

Was it clear to you when the next dose of your medication was DUE after coming home from the hospital?

Yes  No

What errors, issues, or concerns did you have about the discharge medication list from the hospital?

---

Did the hospital doctors make any changes to your medications?

Yes  No

What were the medication changes made in the hospital (such as new, stopped, changed medication doses, how often to take, etc)?

---

Why were the changes made? (e.g., benefit coverage changes, different indications, addressing side effects, etc)?

---

Did the hospital doctors prescribe new medications?

Yes  No

What would happen if you DO NOT take the new medication(s)?

---

### PHARMACIST REVIEW OF PATIENT RESPONSE

Pharmacist review of patient response: [for the question "What would happen if you DO NOT take the new medication(s)"]

Specific and appropriate  
 Not specific but appropriate  
 Not appropriate

### CONTINUE DATA COLLECTION BELOW:

Have you experienced UNEXPECTED side effects to the new medications?

Yes  No

When is the follow-up appointment with your primary care doctor or provider?

\_\_\_\_\_  
 (Type date (mm/dd/yyyy))

Are there prescriptions you have had trouble filling?

Yes  No

If Yes, can you tell me which prescriptions/medications you have had trouble filling?

---

If Yes, what was the reason you had difficulty filling the prescription?

---

**COMPLETE THE FOLLOWING SECTION BY ASKING THE PATIENT**

Were you overwhelmed in the first few days after coming home with the new medication regimen?  Yes  No

Did you spend a lot of time dealing with insurance approval for your medications?  Yes  No

If Yes, who is this person? [CHECK BOTH IF PATIENT AND CAREGIVER INVOLVED]  Patient  Caregiver

Are you worried about the cost of your medications?  Yes  No

**TRANSITIONAL CARE MEASURES (TCM)**

WHO IS RESPONDING?  Patient  Primary caregiver

**On a scale of 1 to 5, 1=Strongly Disagree, 2=Disagree, 3=Neither Agree Nor Disagree, 4=Agree, 5=Strongly Agree, what is your level of agreement with the following statements?**

|                                                                                                                                                                | Strongly Disagree     | Disagree              | Neither Agree Nor Disagree | Agree                 | Strongly Agree        |
|----------------------------------------------------------------------------------------------------------------------------------------------------------------|-----------------------|-----------------------|----------------------------|-----------------------|-----------------------|
| The hospital staff took my preferences and those of my family or caregiver into account in deciding what my healthcare needs would be when I left the hospital | <input type="radio"/> | <input type="radio"/> | <input type="radio"/>      | <input type="radio"/> | <input type="radio"/> |
| When I left the hospital, I had a good understanding of the things I was responsible for in managing my health                                                 | <input type="radio"/> | <input type="radio"/> | <input type="radio"/>      | <input type="radio"/> | <input type="radio"/> |
| When I left the hospital, I clearly understood the purpose of taking each of my medications                                                                    | <input type="radio"/> | <input type="radio"/> | <input type="radio"/>      | <input type="radio"/> | <input type="radio"/> |

**MEDICATION RELATED CONCERNS**

|                                                                             | Strongly Disagree     | Disagree              | Neither Agree nor Disagree | Agree                 | Strongly Agree        |
|-----------------------------------------------------------------------------|-----------------------|-----------------------|----------------------------|-----------------------|-----------------------|
| My medication is helping improve my condition                               | <input type="radio"/> | <input type="radio"/> | <input type="radio"/>      | <input type="radio"/> | <input type="radio"/> |
| My medication does not seem to help that much                               | <input type="radio"/> | <input type="radio"/> | <input type="radio"/>      | <input type="radio"/> | <input type="radio"/> |
| Sometimes I think I take too many medications                               | <input type="radio"/> | <input type="radio"/> | <input type="radio"/>      | <input type="radio"/> | <input type="radio"/> |
| Sometimes I think I may not be taking the right medication for my condition | <input type="radio"/> | <input type="radio"/> | <input type="radio"/>      | <input type="radio"/> | <input type="radio"/> |
| Sometimes my medication has effects I do not like                           | <input type="radio"/> | <input type="radio"/> | <input type="radio"/>      | <input type="radio"/> | <input type="radio"/> |
| Sometimes I feel worse after I take my medication                           | <input type="radio"/> | <input type="radio"/> | <input type="radio"/>      | <input type="radio"/> | <input type="radio"/> |
| I worry about drug interactions between the medications I take              | <input type="radio"/> | <input type="radio"/> | <input type="radio"/>      | <input type="radio"/> | <input type="radio"/> |
| My medication interferes with my routine daily activities                   | <input type="radio"/> | <input type="radio"/> | <input type="radio"/>      | <input type="radio"/> | <input type="radio"/> |
| I have trouble taking my medication the way I am supposed to                | <input type="radio"/> | <input type="radio"/> | <input type="radio"/>      | <input type="radio"/> | <input type="radio"/> |

**Where do you keep your medications?**

|                             | Living room              | Bedroom                  | Bathroom                 | Car                      | Pocket/Purse             | Other                    |
|-----------------------------|--------------------------|--------------------------|--------------------------|--------------------------|--------------------------|--------------------------|
| Medication storage location | <input type="checkbox"/> |

Please type the storage location(s) if Other is answered for the question "Where do you keep your medications?"

---

**Where do you store your medications?**

|                 | Cabinets                 | Drawers                  | Pill boxes               | Table tops               | Baskets                  | Shopping bags            | Zip lock bags            | Fridge                   |
|-----------------|--------------------------|--------------------------|--------------------------|--------------------------|--------------------------|--------------------------|--------------------------|--------------------------|
| Storage Methods | <input type="checkbox"/> |

**What types of medications do you have?**

|                  | Pills/Tables             | Capsules                 | Liquid                   | Inhalers                 | Eye/Ear drops            | Injection                | Skin patches             | Topicals (cream, ointment, lotion) | Other                    |
|------------------|--------------------------|--------------------------|--------------------------|--------------------------|--------------------------|--------------------------|--------------------------|------------------------------------|--------------------------|
| Medication types | <input type="checkbox"/>           | <input type="checkbox"/> |

Do you keep a written list of medications?  Yes  No

Please type any observation about medication list  
(E.g., handwritten, computer printed list, etc)

---

### If Yes, who prepared this list?

|                                           | Myself                   | Caregiver                | Pharmacy                 | Home nurse               | Hospital                 | PCP                      | Other                    |
|-------------------------------------------|--------------------------|--------------------------|--------------------------|--------------------------|--------------------------|--------------------------|--------------------------|
| List prepared by: [CHOOSE ALL THAT APPLY] | <input type="checkbox"/> |

Do you use medication schedule helpers?  Yes  No

### Types of medication schedule helpers:

|                                                                           | Note pads                | Medications schedule grids | Fridge/calendar reminders | Mobile apps              | Automated dispensers     | Other                    |
|---------------------------------------------------------------------------|--------------------------|----------------------------|---------------------------|--------------------------|--------------------------|--------------------------|
| If Yes, what type of schedule helpers do you use? [CHOOSE ALL THAT APPLY] | <input type="checkbox"/> | <input type="checkbox"/>   | <input type="checkbox"/>  | <input type="checkbox"/> | <input type="checkbox"/> | <input type="checkbox"/> |

Do you use pill boxes?  Yes  No

If Yes, do you use them for all pills or only for some pills?  Used for all pills  Used only for some pills

If Yes, how many pill boxes?

---

Sizes of pill boxes used

---

(Note pillbox sizes: E.g., small, medium, large; number of days, frequency of administration)

Do you use blister packs?  Yes  No

### Where do you obtain your medications?

|                                                              | Community pharmacy       | Mail-order pharmacy      | Hospitals                | Outpatient pharmacies    | Sharing other people's medications | Community health centers | Doctor's office          | Other                    |
|--------------------------------------------------------------|--------------------------|--------------------------|--------------------------|--------------------------|------------------------------------|--------------------------|--------------------------|--------------------------|
| Where do you obtain your medications [CHOOSE ALL THAT APPLY] | <input type="checkbox"/>           | <input type="checkbox"/> | <input type="checkbox"/> | <input type="checkbox"/> |

**Who is doing what for medications? [CHECK FOR EACH TASK]**

|                                                                 | Patient                  | Primary Caregiver        | Other                    |
|-----------------------------------------------------------------|--------------------------|--------------------------|--------------------------|
| Reviewing prescriptions/discharge paper work                    | <input type="checkbox"/> | <input type="checkbox"/> | <input type="checkbox"/> |
| Getting medications                                             | <input type="checkbox"/> | <input type="checkbox"/> | <input type="checkbox"/> |
| Filling pill boxes                                              | <input type="checkbox"/> | <input type="checkbox"/> | <input type="checkbox"/> |
| Understand instructions                                         | <input type="checkbox"/> | <input type="checkbox"/> | <input type="checkbox"/> |
| Getting rid of expired medications                              | <input type="checkbox"/> | <input type="checkbox"/> | <input type="checkbox"/> |
| Making sure medications do not run out                          | <input type="checkbox"/> | <input type="checkbox"/> | <input type="checkbox"/> |
| Requesting refills when medications run out                     | <input type="checkbox"/> | <input type="checkbox"/> | <input type="checkbox"/> |
| Communicate/share medication information between family members | <input type="checkbox"/> | <input type="checkbox"/> | <input type="checkbox"/> |

Please describe the patient's living condition

(E.g, House is clean and tidy, messy and unkempt, multiple obstacles in hallway, highly cluttered environment, etc)

Interviewer field notes from home visit

(Type any note you think is relevant . E.g, patient's experience during the hospital stay, discharge, etc.)
